# Supplementary material for: Nineteen and Up study (19Up): understanding pathways to mental health disorders in young Australian twins
Source: PubMed Central journal article supplement — BMJ Open. 2018 Mar 17;8(3):e018959. doi: 10.1136/bmjopen-2017-018959 (PMC5875659; doi:10.1136/bmjopen-2017-018959), 2018-03-17
Supplement: bmjopen-2017-018959supp001.pdf [file bmjopen-2017-018959supp001.pdf]

| NU1 Phase 1 (Feb to Dec 2009)                                                                                                                                                                                                                                                                                                                                                                                                                                                                                                                                                                                   | NU2 Phase 2 (Sept 2010 - Nov 2011)                                                                                                                                                                                                                                                                                                                                                                                                                                                                                                                                                                                                       |                                                                                                                            | NU3 Phase 3 (August 2012 - present)                                                                                                                                                                                                                                                                                                                                                                                                                                                                                                                                                                                                      |                                              |                                           |
|-----------------------------------------------------------------------------------------------------------------------------------------------------------------------------------------------------------------------------------------------------------------------------------------------------------------------------------------------------------------------------------------------------------------------------------------------------------------------------------------------------------------------------------------------------------------------------------------------------------------|------------------------------------------------------------------------------------------------------------------------------------------------------------------------------------------------------------------------------------------------------------------------------------------------------------------------------------------------------------------------------------------------------------------------------------------------------------------------------------------------------------------------------------------------------------------------------------------------------------------------------------------|----------------------------------------------------------------------------------------------------------------------------|------------------------------------------------------------------------------------------------------------------------------------------------------------------------------------------------------------------------------------------------------------------------------------------------------------------------------------------------------------------------------------------------------------------------------------------------------------------------------------------------------------------------------------------------------------------------------------------------------------------------------------------|----------------------------------------------|-------------------------------------------|
| Online self report questionnaire (N = 373)                                                                                                                                                                                                                                                                                                                                                                                                                                                                                                                                                                      | Online self report questionnaire (N = 704)                                                                                                                                                                                                                                                                                                                                                                                                                                                                                                                                                                                               | Computer Assisted Telephone Interview (N=665)                                                                              | Online self report questionnaire 1 (N= 2151)                                                                                                                                                                                                                                                                                                                                                                                                                                                                                                                                                                                             | Online self report questionnaire 2 (N= 1901) | Online self report questionnaire (N=1881) |
|                                                                                                                                                                                                                                                                                                                                                                                                                                                                                                                                                                                                                 |                                                                                                                                                                                                                                                                                                                                                                                                                                                                                                                                                                                                                                          | <b>Marital status, childhood family structure</b><br><b>Number of children</b><br><b>Height and weight</b>                 | <b>Marital status, childhood family structure</b><br><b>Number of children</b><br><b>Height and weight</b>                                                                                                                                                                                                                                                                                                                                                                                                                                                                                                                               |                                              |                                           |
| Alcohol use: ever + age first used<br>Alcohol Use: past # in past 3 months<br>Alcohol Use: ever 5+ week in past 3 months<br>Tobacco use: ever + age first used<br>Tobacco use: past # in past 3 months<br>Cannabis use: ever + age first used<br>Cannabis use: past # in past 3 months<br>Illegal substances: ever, age<br>Illegal substances: used in past 3 months<br>Non-medical use of over the counter/prescription substances: lifetime use<br>Non-medical use of over the counter/prescription substances: used in past 3 months<br>Non-medical use of over the counter/prescription substances: max use | Alcohol use: ever + age first used<br>Alcohol Use: past # in past 3 months<br>Alcohol Use: ever 5+ week in past 3 months<br>Tobacco use: ever + age first used<br>Tobacco use: past # in past 3 months<br>Cannabis use: ever + age first used<br>Cannabis use: past # in past 3 months<br>Illegal substances: ever, age first used, with alcohol<br>Illegal substances: used in past 3 months<br>Non-medical use of over the counter/prescription substances: lifetime use<br>Non-medical use of over the counter/prescription substances: used in past 3 months<br>Non-medical use of over the counter/prescription substances: max use |                                                                                                                            | Alcohol use: ever + age first used<br>Alcohol Use: past # in past 3 months<br>Alcohol Use: ever 5+ week in past 3 months<br>Tobacco use: ever + age first used<br>Tobacco use: past # in past 3 months<br>Cannabis use: ever + age first used<br>Cannabis use: past # in past 3 months<br>Illegal substances: ever, age first used, with alcohol<br>Illegal substances: used in past 3 months<br>Non-medical use of over the counter/prescription substances: lifetime use<br>Non-medical use of over the counter/prescription substances: used in past 3 months<br>Non-medical use of over the counter/prescription substances: max use |                                              |                                           |
|                                                                                                                                                                                                                                                                                                                                                                                                                                                                                                                                                                                                                 |                                                                                                                                                                                                                                                                                                                                                                                                                                                                                                                                                                                                                                          | <b>Recent Occupation</b><br><b>Depression (CIDI)</b><br><b>Social Anxiety (CIDI-based)</b><br><b>Panic Disorder (CIDI)</b> | <b>Recent Occupation</b><br><b>Depression (CIDI)</b><br><b>Social Anxiety (CIDI-based)</b><br><b>Panic Disorder (CIDI)</b>                                                                                                                                                                                                                                                                                                                                                                                                                                                                                                               |                                              |                                           |

|                                         |                                                                                                    |                                                                                                                                           |                                                                                                                                           |                                           |
|-----------------------------------------|----------------------------------------------------------------------------------------------------|-------------------------------------------------------------------------------------------------------------------------------------------|-------------------------------------------------------------------------------------------------------------------------------------------|-------------------------------------------|
|                                         |                                                                                                    | <b>Panic Disorder with Agoraphobia (CIDI)</b>                                                                                             | <b>Panic Disorder with Agoraphobia (CIDI)</b>                                                                                             |                                           |
|                                         | Family relationships (PBI)<br>Family relationships (KPSS)<br>List of Threatening Experiences (LTE) |                                                                                                                                           | Family relationships (PBI)<br>Family relationships (KPSS)<br>List of Threatening Experiences (LTE)                                        |                                           |
|                                         |                                                                                                    | Mania Screen (CIDI-based)                                                                                                                 | Mania Screen (CIDI-based)                                                                                                                 |                                           |
|                                         |                                                                                                    | Mania (CIDI-based)                                                                                                                        | Mania (CIDI-based)                                                                                                                        |                                           |
|                                         |                                                                                                    | Psychosis (CIDI)                                                                                                                          | Psychosis (CIDI)                                                                                                                          |                                           |
| <b>SPHERE 12</b>                        | <b>SPHERE 12</b>                                                                                   |                                                                                                                                           | <b>SPHERE 12</b>                                                                                                                          |                                           |
| <b>CIDI 30 day functioning (brief)</b>  | <b>CIDI 30 day functioning (brief)</b>                                                             |                                                                                                                                           | <b>CIDI 30 day functioning (brief)</b>                                                                                                    |                                           |
| <b>Kessler 6</b>                        | <b>Kessler 6</b>                                                                                   |                                                                                                                                           | <b>Kessler 6</b>                                                                                                                          |                                           |
|                                         | Mania - ASRM                                                                                       |                                                                                                                                           | Mania - ASRM                                                                                                                              |                                           |
|                                         | Psychosis screener (6 item CAPE-based)                                                             |                                                                                                                                           | Psychosis screener (6 item CAPE-based)                                                                                                    |                                           |
|                                         |                                                                                                    | <b>Clinician Mental Health Diagnosis</b>                                                                                                  | <b>Clinician Mental Health Diagnosis</b>                                                                                                  |                                           |
|                                         |                                                                                                    | Alcohol Use Behaviours<br>Nicotine Use Behaviours<br>Marijuana Use Behaviours<br>Ecstasy Use Behaviours<br>Methamphetamine Use Behaviours | Alcohol Use Behaviours<br>Nicotine Use Behaviours<br>Marijuana Use Behaviours<br>Ecstasy Use Behaviours<br>Methamphetamine Use Behaviours |                                           |
| <b>Migraine and Recurrent Headaches</b> | <b>Migraine and Recurrent Headaches</b>                                                            |                                                                                                                                           |                                                                                                                                           | <b>Migraine &amp; Recurrent Headaches</b> |
|                                         | Sleep wake cycles                                                                                  |                                                                                                                                           | Sleep wake cycles                                                                                                                         |                                           |
|                                         | Activity Schedule (ABS NHS)                                                                        |                                                                                                                                           | Activity Schedule (ABS NHS)                                                                                                               |                                           |
|                                         |                                                                                                    |                                                                                                                                           | Pittsburg Sleep Quality Index (PSQI)<br>Insomnia Severity Index (ISI)                                                                     |                                           |
|                                         | <b>Personality Assessment Inventory (PAIBOR)</b>                                                   |                                                                                                                                           |                                                                                                                                           | <b>Personality Assessment</b>             |

|                    |                             |                                                                                                                                                                                                                |
|--------------------|-----------------------------|----------------------------------------------------------------------------------------------------------------------------------------------------------------------------------------------------------------|
|                    |                             |                                                                                                                                                                                                                |
| Inattention (SWAN) | Inattention (SWAN)          |                                                                                                                                                                                                                |
| Hair Loss          | Hair loss                   |                                                                                                                                                                                                                |
|                    |                             | Parent family details<br>Asthma and allergies<br>Motion sickness,<br>vision problems<br>Endometriosis<br>Anorexia and<br>Bulimia Nervosa<br>Gambling<br>Work Aspirations<br>Seasonality, mood<br>and behaviour |
|                    | Romantic preferences        |                                                                                                                                                                                                                |
|                    | Hypermobility questionnaire |                                                                                                                                                                                                                |
|                    |                             | Internet Use                                                                                                                                                                                                   |

|                                                                                                                                                                                        |                      |
|----------------------------------------------------------------------------------------------------------------------------------------------------------------------------------------|----------------------|
|                                                                                                                                                                                        | Inventory (PAIBOR)   |
| Inattention (SWAN)                                                                                                                                                                     |                      |
| Hair loss                                                                                                                                                                              |                      |
| Hair and skin type<br>and Eye colour<br>Parent family<br>details<br>Asthma and<br>allergies<br>Motion sickness,<br>vision problems<br>Endometriosis<br>Anorexia and<br>Bulimia Nervosa |                      |
|                                                                                                                                                                                        | Romantic preferences |
| Hypermobility questionnaire                                                                                                                                                            |                      |
|                                                                                                                                                                                        | Internet Use         |
