# Supplementary material for: Nineteen and Up study (19Up): understanding pathways to mental health disorders in young Australian twins
Source: PubMed Central journal article supplement — BMJ Open. 2018 Mar 17;8(3):e018959. doi: 10.1136/bmjopen-2017-018959 (PMC5875659; doi:10.1136/bmjopen-2017-018959), 2018-03-17
Supplement: bmjopen-2017-018959supp003.pdf [file bmjopen-2017-018959supp003.pdf]

|            |                | Depression        | Hypomania       | Mania           | Psychosis         |
|------------|----------------|-------------------|-----------------|-----------------|-------------------|
| Depression | <i>Case</i>    |                   | 14.4% [12 17.2] | 6.4% [4.8 8.6]  | 12.3% [10.0 15.0] |
|            | <i>Control</i> |                   | 3.5% [2.8 4.4]  | 0.5% [0.2 0.9]  | 5.3% [4.3 6.3]    |
|            | <i>p-value</i> |                   | <b>1.40E-24</b> | <b>9.90E-22</b> | <b>4.10E-10</b>   |
| Hypomania  | <i>Case</i>    | 58.9% [51.2 66.2] |                 | % [0 NA]*       | 18.9% [13.5 25.6] |
|            | <i>Control</i> | 23.6% [22 25.3]   |                 | 2.2% [1.6 2.8]  | 6.3% [5.4 7.3]    |
|            | <i>p-value</i> | <b>1.40E-24</b>   |                 |                 | <b>8.80E-10</b>   |
| Mania      | <i>Case</i>    | 82.1% [69.2 90.7] | % [0 NA]*       |                 | 21.4% [12 34.8]   |
|            | <i>Control</i> | 24.6% [23 26.3]   | 6.4% [5.6 7.5]  |                 | 6.8% [5.9 7.8]    |
|            | <i>p-value</i> | <b>9.90E-22</b>   |                 |                 | <b>7.20E-05</b>   |
| Psychosis  | <i>Case</i>    | 44.9% [37.9 52.1] | 16.8% [12 23]   | 6.1% [3.3 10.7] |                   |
|            | <i>Control</i> | 24.4% [22.7 26.1] | 5.5% [4.7 6.5]  | 1.7% [1.3 2.3]  |                   |
|            | <i>p-value</i> | <b>4.10E-10</b>   | <b>8.80E-10</b> | <b>7.20E-05</b> |                   |

*Supplementary 3: Comorbidity pattern between the clinical syndromes*

\* Mania and Hypomania are mutually exclusive.

NB. Read rows first followed by columns, e.g. of participants with MDD 14.4% also had Hypomania
